# Supplementary material
Source: publisher figshare collection journal article supplement (https://acs.figshare.com/ndownloader/files/9547342)
Supplement: Supplementary file 1 [file 9547342]

# Supporting Information

## Dual Amplification Fluorescence Assay for Alpha Fetal Protein Utilizing Immuno-Hybridization Chain Reaction and Metal-Enhanced Fluorescence of Carbon Nanodots

Dang-Dang Xu<sup>1</sup>, Cui Liu<sup>1</sup>, Cheng-Yu Li<sup>1</sup>, Chong-Yang Song<sup>1</sup>, Ya-Feng Kang<sup>1</sup>, Chu-Bo Qi<sup>2</sup>, Yi Lin<sup>1</sup>,

Dai-Wen Pang<sup>1</sup>, Hong-Wu Tang<sup>1\*</sup>

<sup>1</sup>Key Laboratory of Analytical Chemistry for Biology and Medicine (Ministry of Education), College of Chemistry and Molecular Sciences, The Institute for Advanced Studies, and Wuhan Institute of Biotechnology, Wuhan University, Wuhan, 430072, People's Republic of China

<sup>2</sup>Hubei Cancer Hospital, Wuhan, 430079, People's Republic of China

---

\*Corresponding Author: E-mail: hwtang@whu.edu.cn. Phone: +86-27-68756759. Fax: +86-27-68754067.

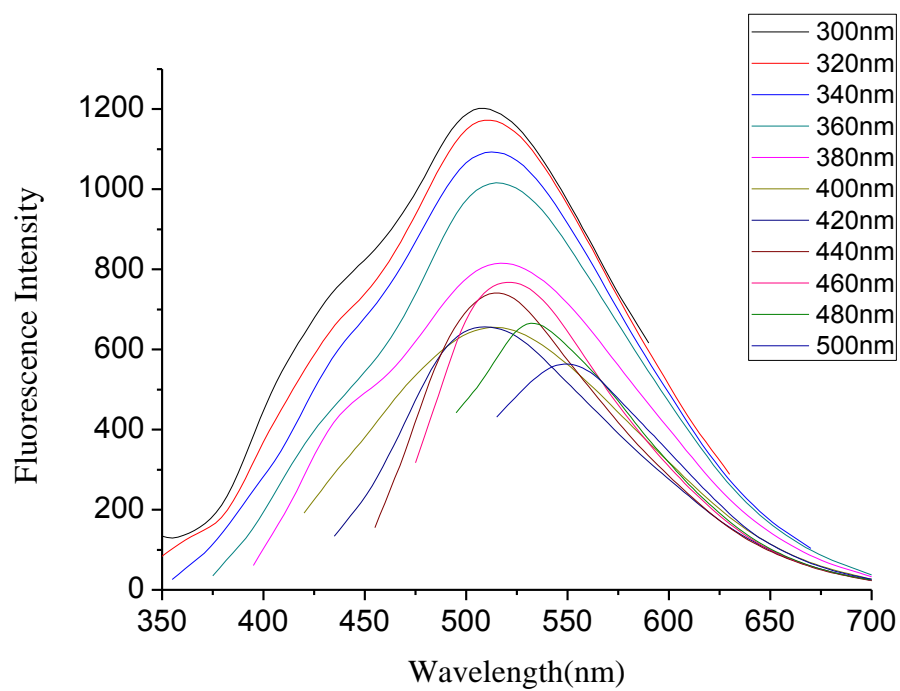

**Figure S1.** Excitation dependent fluorescence emission of CDs under irradiation in the range of 300-500 nm. When excited at 360 nm, the CDs exhibit a strong and broad fluorescence spectrum centered at ~515 nm.

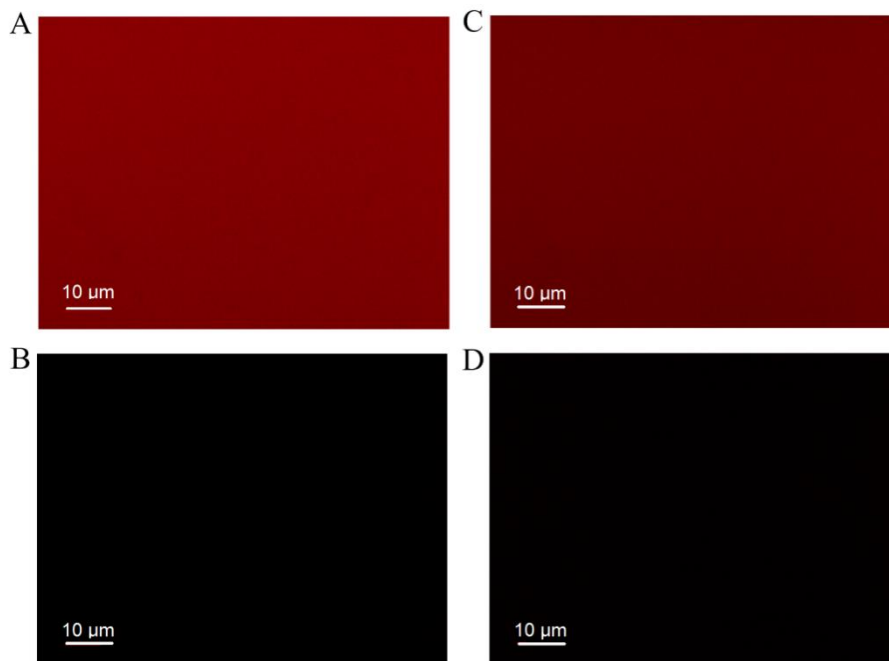

**Figure S2.** Fluorescence images of the Ab<sub>c</sub>-plasmonic slide (A), plasmonic slide (B), Ab<sub>c</sub>-normal slide (C), and normal slide (D) after reacted with Cy3-labeled sheep anti-mouse IgG.

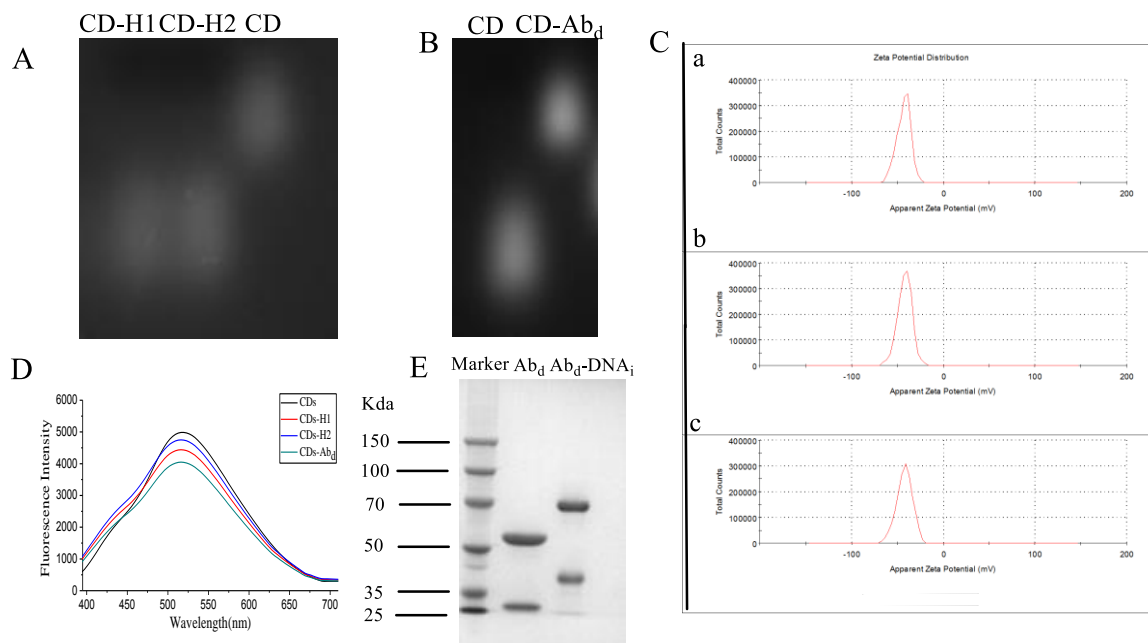

Figure S3. (A) Analysis of CD-DNA conjugation and (B) CD-antibody conjugation by garose gel electrophoresis. (C) The the zeta potentials of CDs-Ab<sub>d</sub> (-43.1mV) (a), CDs-H1 (-42.1mV) (b), CDs-H2 (-42.3mV) (c). (D) The fluorescence emission spectra of CDs, CDs-H1, CDs-H2, CDs-Ab<sub>d</sub>. (E) Analysis of initiator-antibody conjugation by sodium dodecyl sulfate polyacrylamide gel electrophoresis ( SDS-PAGE ).

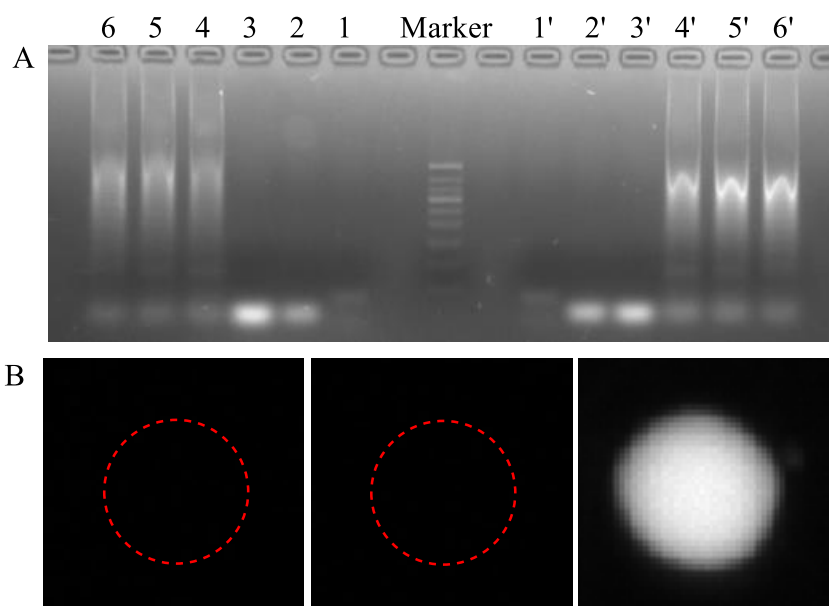

**Figure S4.** (A) Agarose gel electrophoresis image for HCR-based assay with or without coupling CD and annealing steps. Lane marker: DNA size marker; Lane 1: Initiators; Lane 2: H1; Lane 3: H2 ; Lane 4: Initiators/H1/H2:1:5:5; Lane 5: Initiators/H1/H2:1:10:10; Lane 6: Initiators/H1/H2:1:100:100; Lane 1': Initiators; Lane 2': CD-H1; Lane 3': CD-H2 ; Lane 4':  $Ab_d-DNA_i/CD-H1/CD-H2:1:5:5$ ; Lane 5':  $Ab_d-DNA_i/CD-H1/CD-H2:1:10:10$ ; Lane 6':  $Ab_d-DNA_i/CD-H1/CD-H2:1:100:100$ . (B) Characterization of the as-proposed detection system in different condition ( $Ab_d$  without conjugating oligonucleotide initiators reacted with CD-H1 and CD-H2;  $Ab_d-DNA_i$  reacted with CD without conjugating H1 and H2;  $Ab_d-DNA_i$  reacted with CD-H1 and CD-H2).

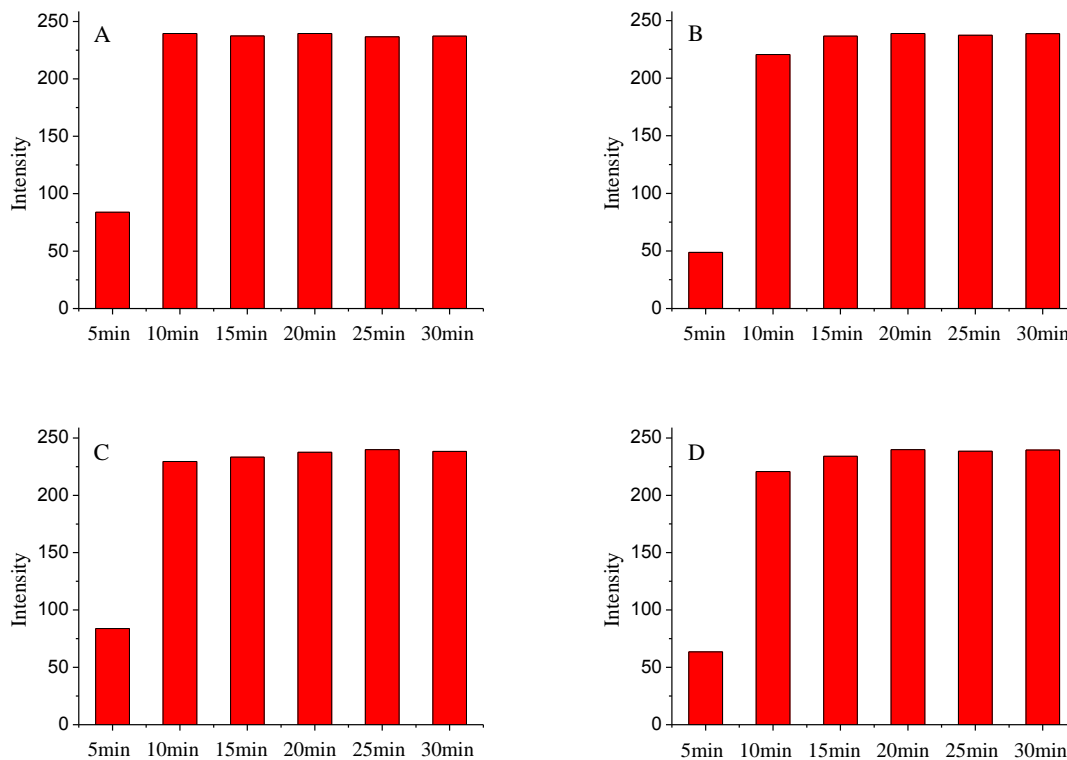

**Figure. S5** (A) Fluorescence intensities of the detection system in different reaction between capture antibody and AFP (20 min for initiator-detection antibody and AFP, 25 min for initiator-detection antibody and DNA solution (H1 and H2)). (B) Fluorescence intensities of the detection system in different reaction between initiator-detection antibody and AFP (15 min for capture antibody and AFP, 25 min for initiator-detection antibody and DNA solution (H1 and H2)). (C) Fluorescence intensities of the detection system in different reaction between CDs-detection antibody and AFP(20 min for capture antibody and AFP). (D) Fluorescence intensities of the detection system in different reaction between initiator-detection antibody and DNA solution (H1 and H2) (15 min for capture antibody and AFP, 20 min for initiator-detection antibody and AFP).

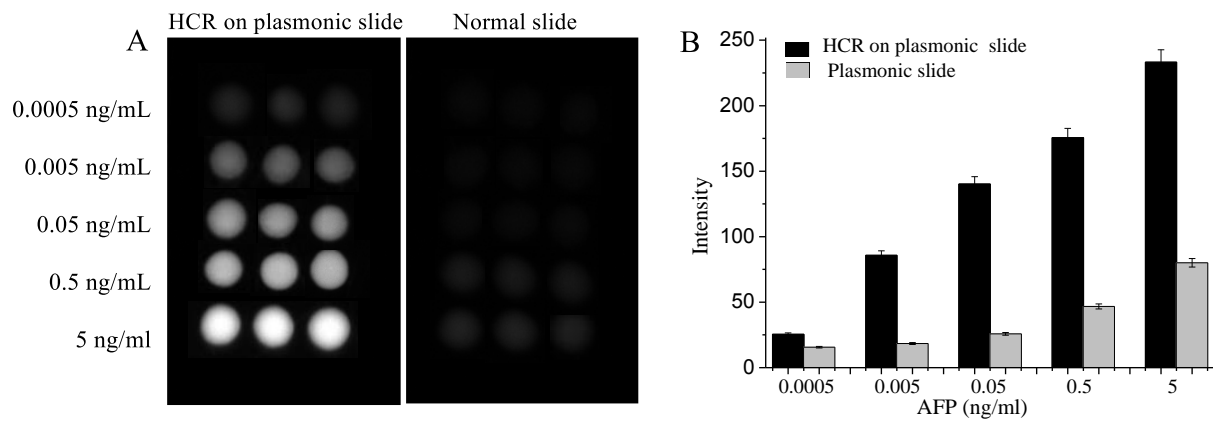

**Figure. S6** (A) Fluorescence diagram of the system upon the addition of increasing amount of AFP on HCR-plasmonic slide and normal slide. (B) The histogram of contrastive fluorescence intensity between HCR-plasmonic slide and normal slide.
